# Supplementary material for: COVID-19 Associated Mucormycosis: A Systematic Review from Diagnostic Challenges to Management
Source: MDPI journal article supplement (doi:10.3390/diseases9040065), 2021-09-22
Supplement: s1 [file s1]

## Online Supplementary Material

**Supplementary Table S1:** Characteristics of studied included in the systematic review.

| First Author                  | Country                                                       | Time Period of Study      | Type of Study              | Number of People Affected | Number of Deaths | Diagnosis                                      | Treatment                                                                                                                   | Outcome                                                                                                                                                        |
|-------------------------------|---------------------------------------------------------------|---------------------------|----------------------------|---------------------------|------------------|------------------------------------------------|-----------------------------------------------------------------------------------------------------------------------------|----------------------------------------------------------------------------------------------------------------------------------------------------------------|
| Satish et al [1]              | India                                                         | March 2020 - Dec 2020     | Retrospective Chart Review | 25                        | 2                | KOH staining of Nasal cavity crusts, CT scan   | IV amphotericin (50 mg/day). Debridement once stable                                                                        | Surgical debridement in 20 people, 5 patients went against medical advice. 1 patient presented one month later with vision loss. 2 patients died on follow up. |
| Ravani et al [2]              | India                                                         | Sept 2020- mid March 2021 | Retrospective cohort study | 31                        | 3                | CT imaging                                     | IV Amphotericin B                                                                                                           | 3 patients died, 28 patients recovered and were alive on follow up                                                                                             |
| Sharma et al [3]              | India                                                         | April 2021                | Observational study        | 23                        | 0                | CT imaging                                     | Surgical debridement                                                                                                        | All recovered except 2 who were lost to follow up                                                                                                              |
| Singh et al [4]               | UK, USA, Mexico, Iran, Brazil, France, Italy, Turkey, Austria | May 2021                  | Systematic Review          | 101                       | 31               | N/A                                            | N/A                                                                                                                         | N/A                                                                                                                                                            |
| Mehta et al [5]               | India                                                         | Sept 2020                 | Case Report                | 1                         | 1                | MRI, nasal biopsy                              | IV meropenem (1 gm thrice daily), Vancomycin (1gm twice daily), Amphotericin B (0.5mg/kg/day), cessation of steroid therapy | Died on 6 <sup>th</sup> day of admission                                                                                                                       |
| Werthman-Ehrenreich et al [6] | USA                                                           | April 2021                | Case Report                | 1                         | 1                | Face CT scan, nasal swab culture, MRI of brain | Vancomycin, Piperacillin-tazobactam, Amphotericin B                                                                         | Died on day 26 of hospitalization.                                                                                                                             |
| Sarkar et al [7]              | India                                                         | April 2021                | Letter to Editor           | 10                        | 4                | KOH staining, nasal biopsy,                    | Amphotericin B, 4 patients received Remdesivir                                                                              | 4 patients died within 1 month of diagnosis, 5 had                                                                                                             |

|                                   |                      |            |                                 |                  |    |                                                                   |                                                                             |                                                                                                        |
|-----------------------------------|----------------------|------------|---------------------------------|------------------|----|-------------------------------------------------------------------|-----------------------------------------------------------------------------|--------------------------------------------------------------------------------------------------------|
|                                   |                      |            |                                 |                  |    |                                                                   |                                                                             | irreversible vision loss, 1 had favourable outcome                                                     |
| <b>Revannavar et al [8]</b>       | India                | April 2021 | Case Report                     | 1                | 0  | Functional endoscopic sinus surgery (FESS), Nasal biopsy, culture | Amphotericin B, aspirin                                                     | Showed favourable outcome                                                                              |
| <b>Karimi-Galougahi et al [9]</b> | Iran                 | March 2021 | Case Report                     | 1                | 0  | Sino-nasal endoscopy                                              | Insulin, systemic anti-fungal, surgical debridement                         | Exenteration of the eye, the patient survived                                                          |
| <b>Mekonnen et al [10]</b>        | USA                  | Nov 2020   | Case Report                     | 1                | 1  | CT angiography, nasal endoscopic biopsy, Fungal culture           | IV vancomycin, cefepime, Liposomal Amphotericin B, glucose management       | Died on day 31 of hospitalization                                                                      |
| <b>Do Monte Junior et al [11]</b> | Brazil               | Nov 2020   | Case Report                     | 1                | 1  | Chest CT, esophago-gastro-duodenoscopy                            | Ceftriaxone, azithromycin, oseltamivir, hydrocortisone                      | Died 1 week after hospitalization                                                                      |
| <b>Garg et al [12]</b>            | India                | Feb 2021   | Case Report & Systematic Review | 8 (1 index case) | 7  | Sputum fungal culture                                             | Liposomal Amphotericin B (3mg/kg)                                           | Index case discharged 54 days after hospitalization and received Amphotericin B on an outpatient basis |
| <b>Alekseyev et al [13]</b>       | USA                  | March 2021 | Case Report                     | 1                | 0  | CT scan and MRI                                                   | Multiple surgical debridements, IV abelcet, IV heparin                      | Discharged to complete course of coumadin and Abelcet                                                  |
| <b>Johnson et al [14]</b>         | USA                  | June 2021  | Case Report                     | 1                | 1  | Bronchioalveolar lavage (BAL), fungal culture                     | IV Liposomal amphotericin B, IV voriconazole, IV vancomycin, IV ceftriaxone | Discharged to long term acute care facility                                                            |
| <b>Veisi et al [15]</b>           | Iran                 | April 2021 | Case Report                     | 2                | 1  | Nasal endoscopic biopsy                                           | Amphotericin B, Endoscopic debridement                                      | 1 patient died, 1 was managed successfully                                                             |
| <b>Maini et al [16]</b>           | India                | May 2021   | Case Report                     | 1                | 0  | FESS, MRI                                                         | IV Fluconazole, IV Amphotericin B                                           | Recovered with minimum deformity                                                                       |
| <b>Saldanha et al [17]</b>        | India                | April 2021 | Case Report                     | 1                | 0  | Nasal endoscopy, CT scan                                          | Endoscopic surgery, Amphotericin B (25 mg/day)                              | Discharged with left eye vision loss                                                                   |
| <b>Pasero et al [18]</b>          | Italy                | Dec 2020   | Case Report                     | 1                | 1  | Bronchial aspirate culture, CT scan, sinus biopsy                 | Amphotericin B (5mg/kg), surgical debridement, Isavuconazole                | Died on day 62 of ICU admission                                                                        |
| <b>Zurl et al [19]</b>            | Austria              | Feb 2021   | Case Report                     | 1                | 1  | CT scan, post-mortem lung tissue biopsy                           | Tocilizumab, high dose glucocorticoids                                      | Died on day 24 of symptom onset                                                                        |
| <b>Hoenigl et al [20]</b>         | India, USA, Pakistan | April 2021 | Systematic Review               | 80               | 39 | Radiologic findings, positive culture, or PCR                     | Amphotericin B                                                              | 39 patients died, 19 lost vision,                                                                      |

|                                |                                                                                                                 |                  |                        |   |   |                                                                                                     |                                                                                                                       |                                                                        |
|--------------------------------|-----------------------------------------------------------------------------------------------------------------|------------------|------------------------|---|---|-----------------------------------------------------------------------------------------------------|-----------------------------------------------------------------------------------------------------------------------|------------------------------------------------------------------------|
|                                | France, Iran, Mexico, Russia, Bangladesh, Brazil, Chile, Czech Republic, Germany, Italy, Kuwait, Lebanon Turkey |                  |                        |   |   |                                                                                                     | Posaconazole, Isavuconazole in combination, as salvage or monotherapy                                                 | Surgery improved outcome                                               |
| <b>Krishna et al [21]</b>      | UK                                                                                                              | April 2020       | Case Report            | 1 | 1 | CT pulmonary angiography, Tracheal aspirate culture, urine culture, Fungal biomarkers, PCR, autopsy | Steroids, continuous venovenous hemodiafiltration, therapy to meropenem and teicoplanin                               | Died after 20 days of ICU stay                                         |
| <b>Arana et al [22]</b>        | Spain                                                                                                           | April & Nov 2020 | Case Report            | 2 | 0 | Facial CT, endoscopic evaluation,                                                                   | Amphotericin B and an azole, tacrolimus, and posaconazole, surgical debridement, fasciotomy                           | Recovery in 5 months for patient 1, and in 3 months for patient 2      |
| <b>Nehara et al [23]</b>       | India                                                                                                           | Nov – Dec 2020   | Case Series            | 5 | 2 | CT paranasal sinus, MRI Brain and orbit, Lactophenol cotton blue and KOH mount                      | liposomal amphotericin B (5mg/kg/day)                                                                                 | 2 patients died, 2 patients had a full recovery, 1 patient lost an eye |
| <b>Krishna et al [24]</b>      | India                                                                                                           | April 2021       | Case Reports           | 2 | 0 | CBCT, CT scan, surgical resection                                                                   | IV liposomal Amphotericin B 5 mg/kg/day, Itraconazole 200 mg, IV liposomal Amphotericin B 250 mg, Posaconazole 300 mg | Full recovery                                                          |
| <b>Rao et al [25]</b>          | India                                                                                                           | June 2021        | Case Report            | 1 | 0 | MRI, post-contrast scans, MR angiography, endoscopic-guided deep nasal swab                         | intravenous liposomal amphotericin                                                                                    | Partial recovery with loss of direct and consensual light reflex       |
| <b>Khatrri et al [26]</b>      | USA                                                                                                             | Feb 2020         | Case report and Review | 1 | 1 | CT chest                                                                                            | IV liposomal amphotericin B 550 mg/d and posaconazole 300 mg/d, debridement                                           | The patient died on the 175 <sup>th</sup> day of hospital stay         |
| <b>Waizel-Haiat et al [27]</b> | Mexico                                                                                                          | Feb 2021         | Case Report            | 1 | 1 | contrast-enhanced CT, Rhinoscopy                                                                    | Surgical management                                                                                                   | Death due to organ failure                                             |
| <b>Kanwar et al [28]</b>       | USA                                                                                                             | Nov 2020         | Case Report            | 1 | 1 | CT chest, blood, and sputum cultures                                                                | intravenous (IV) vancomycin, piperacillin-tazobactam                                                                  | The patient succumbed to cardiac arrest                                |

|                               |             |                       |                                   |    |   |                                                                   |                                                                                              |                                                                         |
|-------------------------------|-------------|-----------------------|-----------------------------------|----|---|-------------------------------------------------------------------|----------------------------------------------------------------------------------------------|-------------------------------------------------------------------------|
| <b>Sen et al [29]</b>         | India       | Aug 2020 – Dec 2020   | Retrospective Study               | 6  | 0 | sinus biopsy, deep nasal swab, MRI, CT scan                       | IV liposomal amphotericin B, posaconazole and surgical debridement                           | Full recovery of all patients at follow-up                              |
| <b>Meshram et al [30]</b>     | India       | May 2021              | Letter to the editor              | 2  | 2 | MRI-PNS, bronchoalveolar lavage with biopsy                       | Maxillectomy, IV amphotericin B                                                              | Both patients succumbed to death                                        |
| <b>Miishra et al [31]</b>     | India       | Aug 2020 – Dec 2020   | Retrospective Case Review         | 10 | 5 | CT PNS and MRI                                                    | Local debridement, IV amphotericin B, FESS                                                   | 1 patient was lost to follow-up, 4 patients died, 4 recovered           |
| <b>Moorthy et al [32]</b>     | India       | May 2020 – Dec 2020   | Retrospective multi-centric study | 17 | 7 | CT, MRI of the face, orbits, and brain, KOH test, sinus endoscopy | surgical debridement, maxillectomy, liposomal amphotericin therapy 3–5 mg/kg                 | 10 patients recovered, 7 patients died of which 1 was lost to follow-up |
| <b>Hanley et al [33]</b>      | UK          | March – April 2020    | Post-mortem study                 | 9  | 9 | Full autopsies, percutaneous biopsy sampling                      | N/A                                                                                          | Death                                                                   |
| <b>Dallalzadeh et al [34]</b> | USA         | Jan 2021              | Case Report                       | 2  | 2 | Fundoscopy exam, MRI, culture, CT scan                            | Intravenous amphotericin, isavuconazole, and micafungin, lateral canthotomy, and cantholysis | Died on day 4 of treatment                                              |
| <b>Placik et al [35]</b>      | USA         | Aug 2020              | Case Report                       | 1  | 1 | Intraoperative samples, CT chest                                  | amphotericin B, surgical resection                                                           | Died on day 21                                                          |
| <b>Bellanger et al [36]</b>   | France      | Dec 2020              | Case Report                       | 1  | 1 | Respiratory samples, CT                                           | liposomal amphotericin B                                                                     | Died after 40 days of admission                                         |
| <b>Sargin et al [37]</b>      | Turkey      | Jan 2021              | Case Report                       | 1  | 1 | biopsy and culture                                                | Liposomal amphotericin B, debridement, tracheostomy, Colimicin treatment                     | Died on the 10 <sup>th</sup> day of hospitalization                     |
| <b>Pakdel et al [38]</b>      | Iran        | June 2021             | Cross-sectional                   | 15 | 7 | Biopsy, MRI, CT scan                                              | IV amphotericin B liposomal, oral Posaconazole, IV Caspofungin, sinus debridement            | 7 patients died, 8 recovered                                            |
| <b>Buil et al [39]</b>        | Netherlands | Dec 2020 – May 2021   | Case series                       | 4  | 3 | CT scan, sputum cultures, lung biopsy                             | liposomal amphotericin B, Voriconazole, Posaconazole, Surgical debridement                   | 3 patients died in ICU, 1 is undergoing antifungal treatment in ICU     |
| <b>Bayram et al [40]</b>      | Turkey      | March 2020 - Dec 2020 | Prospective observational         | 11 | 7 | CT scan/MRI                                                       | intravenous and retrobulbar liposomal amphotericin B, radical debridement                    | 4 patients recovered, 7 died                                            |
| <b>Rabagilati et al [41]</b>  | Chile       | May–July, 2020        | Retrospective cohort              | 2  | 1 | CT scan, chest x-ray                                              | Liposomal amphotericin B                                                                     | 1 patient died; 1 patient recovered                                     |

|                              |       |               |             |   |     |                     |                                                             |                                         |
|------------------------------|-------|---------------|-------------|---|-----|---------------------|-------------------------------------------------------------|-----------------------------------------|
| <b>Bhavani et al</b><br>[42] | India | March<br>2021 | Case Report | 1 | N/A | CT scan/MRI, biopsy | N/A                                                         | N/A                                     |
| <b>Khan N et al</b><br>[43]  | USA   | Nov<br>2021   | Case Report | 1 | 1   | CT scan             | voriconazole 250 mg IV,<br>piperacillin/tazobactam 4.5 g IV | Died on day 17 of hospital<br>admission |

**Supplementary Table S2: Detailed search strategy**

|                        |                                                                                                                                                                                                                                                                                                                                                                                                                                                                                                                                                                                                                                                                                                                                                                                                                                                                                                                                                                                                                                                                                                                                                                                                                                                                                                                                                                                                                                                                                                                                                                               |
|------------------------|-------------------------------------------------------------------------------------------------------------------------------------------------------------------------------------------------------------------------------------------------------------------------------------------------------------------------------------------------------------------------------------------------------------------------------------------------------------------------------------------------------------------------------------------------------------------------------------------------------------------------------------------------------------------------------------------------------------------------------------------------------------------------------------------------------------------------------------------------------------------------------------------------------------------------------------------------------------------------------------------------------------------------------------------------------------------------------------------------------------------------------------------------------------------------------------------------------------------------------------------------------------------------------------------------------------------------------------------------------------------------------------------------------------------------------------------------------------------------------------------------------------------------------------------------------------------------------|
| <b>PubMed (276)</b>    | ("covid 19"[All Fields] OR "covid 19"[MeSH Terms] OR "covid 19 vaccines"[All Fields] OR "covid 19 vaccines"[MeSH Terms] OR "covid 19 serotherapy"[All Fields] OR "covid 19 serotherapy"[Supplementary Concept] OR "covid 19 nucleic acid testing"[All Fields] OR "covid 19 nucleic acid testing"[MeSH Terms] OR "covid 19 serological testing"[All Fields] OR "covid 19 serological testing"[MeSH Terms] OR "covid 19 testing"[All Fields] OR "covid 19 testing"[MeSH Terms] OR "sars cov 2"[All Fields] OR "sars cov 2"[MeSH Terms] OR "severe acute respiratory syndrome coronavirus 2"[All Fields] OR "ncov"[All Fields] OR "2019 ncov"[All Fields] OR (("coronavirus"[MeSH Terms] OR "coronavirus"[All Fields] OR "cov"[All Fields]) AND 2019/11/01:3000/12/31[Date - Publication]) OR ("sars cov 2"[MeSH Terms] OR "sars cov 2"[All Fields] OR "sars cov 2"[All Fields])) AND ("mucormycosis"[MeSH Terms] OR "mucormycosis"[All Fields] OR "mucormycoses"[All Fields] OR (("african continental ancestry group"[MeSH Terms] OR ("african"[All Fields] AND "continental"[All Fields] AND "ancestry"[All Fields] AND "group"[All Fields]) OR "african continental ancestry group"[All Fields] OR "black"[All Fields] OR "african americans"[MeSH Terms] OR ("african"[All Fields] AND "americans"[All Fields]) OR "african americans"[All Fields] OR "blacks"[All Fields] OR "blackness"[All Fields]) AND ("fungi"[MeSH Terms] OR "fungi"[All Fields] OR "fungus"[All Fields] OR "fungis"[All Fields] OR "microbiology"[MeSH Subheading] OR "microbiology"[All Fields])))) |
| <b>PMC NCBI (1325)</b> | ((("COVID-19"[All Fields] OR "COVID-19"[MeSH Terms] OR "COVID-19 Vaccines"[All Fields] OR "COVID-19 Vaccines"[MeSH Terms] OR "COVID-19 serotherapy"[All Fields] OR "COVID-19 Nucleic Acid Testing"[All Fields] OR "covid-19 nucleic acid testing"[MeSH Terms] OR "COVID-19 Serological Testing"[All Fields] OR "covid-19 serological testing"[MeSH Terms] OR "COVID-19 Testing"[All Fields] OR "covid-19 testing"[MeSH Terms] OR "SARS-CoV-2"[All Fields] OR "sars-cov-2"[MeSH Terms] OR "Severe Acute Respiratory Syndrome Coronavirus 2"[All Fields] OR "NCOV"[All Fields] OR "2019 NCOV"[All Fields] OR (("coronavirus"[MeSH Terms] OR "coronavirus"[All Fields] OR "COV"[All Fields]) AND 2019/11/01[PubDate] : 3000/12/31[PubDate])) OR ("sars-cov-2"[MeSH Terms] OR "sars-cov-2"[All Fields] OR "sars cov 2"[All Fields])) AND ((("mucormycosis"[MeSH Terms] OR "mucormycosis"[All Fields]) OR (("african continental ancestry group"[MeSH Terms] OR ("african"[All Fields] AND "continental"[All Fields] AND "ancestry"[All Fields] AND "group"[All Fields]) OR "african continental ancestry group"[All Fields] OR "black"[All Fields] OR "african americans"[MeSH Terms] OR ("african"[All Fields] AND "americans"[All Fields]) OR "african americans"[All Fields]) AND                                                                                                                                                                                                                                                                                              |

|  |                                                                                                                           |
|--|---------------------------------------------------------------------------------------------------------------------------|
|  | ("fungi"[MeSH Terms] OR "fungi"[All Fields] OR "fungus"[All Fields])) AND ("0001/01/01"[PubDate] : "2021/06/30"[PubDate]) |
|--|---------------------------------------------------------------------------------------------------------------------------|

**Supplementary Table S3:** Total number of cases of COVID-associated mucormycosis (CAM) by countries.

| Country     | Number of CAM cases |
|-------------|---------------------|
| India       | 138                 |
| Iran        | 18                  |
| Turkey      | 12                  |
| USA         | 10                  |
| UK          | 10                  |
| Netherlands | 4                   |
| Chile       | 2                   |
| Spain       | 2                   |
| Austria     | 1                   |
| France      | 1                   |
| Brazil      | 1                   |
| Mexico      | 1                   |
| Italy       | 1                   |

## References

1. Satish, D.; Joy, D.; Ross, A.; Balasubramanya. Mucormycosis coinfection associated with global COVID-19: a case series from India. *Int. J. Otorhinolaryngol. Head. Neck. Surg* **2021**, *7*, 815; doi: 10.18203/issn.2454-5929.ijohns20211574.
2. Ravani, S.A.; Agrawal, G.A.; Leuva, P.A.; Modi, P.H.; Amin, K.D. Rise of the phoenix: Mucormycosis in COVID-19 times. *Indian. J. Ophthalmol* **2021**, *69*, 1563–8; doi: 10.4103/ijo.IJO\_310\_21.
3. Sharma, S.; Grover, M.; Bhargava, S.; Samdani, S.; Kataria, T. Post coronavirus disease mucormycosis: a deadly addition to the pandemic spectrum. *J. Laryngol. Otol* **2021**, *135*, 442–7; doi: 10.1017/S0022215121000992.
4. Singh, A.K.; Singh, R.; Joshi, S.R.; Misra, A. Mucormycosis in COVID-19: A systematic review of cases reported worldwide and in India. *Diabetes. Metab. Syndr. Clin. Res. Rev* **2021**, *15*, 102146; doi: 10.1016/j.dsx.2021.05.019.
5. Mehta, S.; Pandey, A. Rhino-Orbital Mucormycosis Associated With COVID-19. *Cureus* **2020**, *12*, e10726; doi: 10.7759/cureus.10726.
6. Werthman-Ehrenreich, A. Mucormycosis with orbital compartment syndrome in a patient with COVID-19. *Am. J. Emerg. Med* **2021**, *42*, e5-e8; doi: 10.1016/j.ajem.2020.09.032.

7. Sarkar, S.; Gokhale, T.; Choudhury, S.; Deb, A. COVID-19 and orbital mucormycosis. *Indian. J. Ophthalmol* **2021**, *69*, 1002–1004. doi: 10.4103/ijo.IJO\_3763\_20.
8. Revannavar, S.M.; Supriya, P.S.; Samaga, L.; Vineeth V.K. COVID-19 triggering mucormycosis in a susceptible patient: a new phenomenon in the developing world? *BMJ. Case. Rep* **2021**, *14*, 241663. doi: 10.1136/bcr-2021-241663.
9. Karimi-Galougahi, M.; Arastou, S.; Haseli, S. Fulminant mucormycosis complicating coronavirus disease 2019 (COVID-19). *Int. Forum. Allergy. Rhinol* **2021**, *11*, 1029–1030; doi: 10.1002/alr.22785.
10. Mekonnen, Z.K.; Ashraf, D.C.; Jankowski, T.; Grob, S.R.; Vagefi, M.R.; Kersten, R.C.; et al. Acute Invasive Rhino-Orbital Mucormycosis in a Patient with COVID-19-Associated Acute Respiratory Distress Syndrome. *Ophthal. Plast. Reconstr. Surg* **2021**, *37*, E40–2; doi: 10.1097/IOP.0000000000001889.
11. Monte Junior, E.S.D.; Santos, M.E.L.D.; Ribeiro, I.B.; Luz, G.O.; Baba, E.R.; Hirsch, B.S.; et al. Rare and fatal gastrointestinal mucormycosis (Zygomycosis) in a COVID-19 patient: A case report. *Clin Endosc* **2020**, *53*, 746–749; doi: 10.5946/ce.2020.180.
12. Garg, D.; Muthu, V.; Sehgal, I.S.; Ramachandran, R.; Kaur, H.; Bhalla, A.; et al. Coronavirus Disease (Covid-19) Associated Mucormycosis (CAM): Case Report and Systematic Review of Literature. *Mycopathologia* **2021**, *186*, 289–98; doi: 10.1007/s11046-021-00528-2
13. Alekseyev, K.; Didenko, L.; Chaudhry, B. Rhinocerebral Mucormycosis and COVID-19 Pneumonia. *J. Med. Cases* **2021**, *12*, 85; doi: 10.14740/jmc3637.
14. Johnson, A.K.; Ghazarian, Z.; Cendrowski, K.D.; Persichino, J.G. Pulmonary aspergillosis and mucormycosis in a patient with COVID-19. *Med. Mycol. Case. Rep* **2021**, *32*, 64–7; doi: 10.1016/j.mmcr.2021.03.006.
15. Veisi, A.; Bagheri, A.; Eshaghi, M.; Rikhtehgar, M.H.; Kanavi, M.R.; Farjad, R. Rhino-orbital mucormycosis during steroid therapy in COVID-19 patients: A case report. *Eur. J. Ophthalmol* **2021**, 11206721211009450; doi: 10.1177/11206721211009450.
16. Maini, A.; Tomar, G.; Khanna, D.; Kini, Y.; Mehta, H.; Bhagyasree, V. Sino-orbital mucormycosis in a COVID-19 patient: A case report. *Int. J. Surg. Case. Rep* **2021**, *82*, 105957; doi: 10.1016/j.ijscr.2021.105957.
17. Saldanha, M.; Reddy, R.; Vincent, M.J. Title of the Article: Paranasal Mucormycosis in COVID-19 Patient. *Indian. J. Otolaryngol. Head. Neck. Surg* **2021**, 1–4; doi: 10.1007/s12070-021-02574-0.
18. Pasero, D.; Sanna, S.; Liperi, C.; Piredda, D.; Branca, GP.; Casadio, L.; et al. A challenging complication following SARS-CoV-2 infection: a case of pulmonary mucormycosis. *Infection* **2020**; doi: 10.1007/s15010-020-01561-x.
19. Zurl, C.; Hoenigl, M.; Schulz, E.; Hatzl, S.; Gorkiewicz, G.; Krause, R.; et al. Autopsy proven pulmonary mucormycosis due to *Rhizopus microsporus* in a critically ill COVID-19 patient with underlying hematological malignancy. *J. Fungi* **2021**, *7*, 88; doi: 10.3390/jof7020088.
20. Hoenigl M, Seidel D, Carvalho A, Rudramurthy SM, Arastehfar A, Gangneux JP, et al. The Emergence of COVID-19 Associated Mucormycosis: Analysis of Cases From 18 Countries. *SSRN Electron J* **2021**, [Preprint]; Available from: <https://www.ssrn.com/abstract=3844587>

21. Krishna, V.; Morjaria, J.; Jalandari, R.; Omar, F.; Kaul, S. Autoptic identification of disseminated mucormycosis in a young male presenting with cerebrovascular event, multi-organ dysfunction and COVID-19 infection. *IDCases* **2021**, *25*, e01172; doi: 10.1016/j.idcr.2021.e01172.
22. Arana, C.; Cuevas Ramírez, R.E.; Xipell, M.; Casals, J.; Moreno, A.; Herrera, S.; et al. Mucormycosis associated with covid19 in two kidney transplant patients. *Transpl. Infect. Dis* **2021**, e13652; DOI: 10.1111/tid.13652.
23. Nehara, H.R.; Puri, I.; Singhal, V.; IH S, Bishnoi BR, Sirohi P. Rhinocerebral mucormycosis in COVID-19 patient with diabetes a deadly trio: Case series from the north-western part of India. *Indian. J. Med. Microbiol* **2021**, *39*, 380–3; doi: 10.1016/j.ijmmb.2021.05.009.
24. Sai Krishna, D.; Raj, H.; Kurup, P.; Juneja, M. Maxillofacial Infections in Covid-19 Era—Actuality or the Unforeseen: 2 Case Reports. *Indian. J. Otolaryngol. Head. Neck. Surg* **2021**, 1–4; doi: 10.1007/s12070-021-02618-5.
25. Rao, R.; Shetty, A.P.; Nagesh, C.P. Orbital infarction syndrome secondary to rhino-orbital mucormycosis in a case of COVID-19: Clinico-radiological features. *Indian. J. Ophthalmol* **2021**, *69*, 1627–30; doi: 10.1007/s12070-021-02618-5.
26. Khatri, A.; Chang, K-M.; Berlinrut, I.; Wallach, F. Mucormycosis after Coronavirus disease 2019 infection in a heart transplant recipient – Case report and review of literature. *J. Med. Mycol* **2021**, *31*, 101125; doi: 10.1016/j.mycmed.2021.101125.
27. Waizel-Haiat, S.; Guerrero-Paz, J.A.; Sanchez-Hurtado, L.; Calleja-Alarcon, S.; Romero-Gutierrez, L. A Case of Fatal Rhino-Orbital Mucormycosis Associated With New Onset Diabetic Ketoacidosis and COVID-19. *Cureus* **2021**, *13*, e13163; doi: 10.7759/cureus.13163.
28. Kanwar, A.; Jordan, A.; Olewiler, S.; Wehberg, K.; Cortes, M.; Jackson, B.R. A fatal case of rhizopus azygosporus pneumonia following covid-19. *J. Fungi* **2021**, *7*:1–6; doi: 10.3390/jof7030174.
29. Sen, M.; Lahane, S.; Lahane, T.P.; Parekh, R.; Honavar, S.G. Mucor in a Viral Land: A Tale of Two Pathogens. *Indian. J. Ophthalmol* **2021**, *69*:244–52; doi: 10.4103/ijo.IJO\_3774\_20.
30. Meshram, H.S.; Kute, V.B.; Chauhan, S.; Desai, S. Mucormycosis in post-COVID-19 renal transplant patients: A lethal complication in follow-up. *Transpl. Infect. Dis* **2021**, e13663; doi: 10.1111/tid.13663.
31. Mishra, N.; Mutya, V.S.S.; Thomas, A.; Rai, G.; Reddy, B.; Mohanan A.A.; et al. A case series of invasive mucormycosis in patients with COVID-19 infection. *Int. J. Otorhinolaryngol. Head. Neck. Surg* **2021**, *7*, 867; doi: 10.18203/issn.2454-5929.ijohns20211583.
32. Moorthy, A.; Gaikwad, R.; Krishna, S.; Hegde, R.; Tripathi, K.K.; Kale, P.G.; et al. SARS-CoV-2, Uncontrolled Diabetes and Corticosteroids—An Unholy Trinity in Invasive Fungal Infections of the Maxillofacial Region? A Retrospective, Multi-centric Analysis. *J. Maxillofac. Oral. Surg* **2021**, *20*, 1–8; doi: 10.1007/s12663-021-01532-1.
33. Hanley, B.; Naresh, K.N.; Roufosse, C.; Nicholson, A.G.; Weir, J.; Cooke, G.S.; et al. Histopathological findings and viral tropism in UK patients with severe fatal COVID-19: a post-mortem study. *Lancet. Microbe* **2020**, *1*, e245–53; doi: 10.1016/S2666-5247(20)30115-4.
34. Dallalzadeh, L.O.; Ozzello, D.J.; Liu, C.Y.; Kikkawa, D.O.; Korn, B.S. Secondary infection with rhino-orbital cerebral mucormycosis associated with COVID-19. *Orbit* **2021**, 1–4; doi: 10.1080/01676830.2021.1903044.
35. Placik, D.A.; Taylor, W.L.; Wnuk, N.M. Bronchopleural fistula development in the setting of novel therapies for acute respiratory distress syndrome in SARS-CoV-2 pneumonia. *Radiol. Case. Reports* **2020**, *15*, 2378–81; doi: 10.1016/j.radcr.2020.09.026.



36. Bellanger, A-P.; Navellou, J-C.; Lepiller, Q.; Brion, A.; Brunel, A-S.; Millon, L.; et al. Mixed mold infection with *Aspergillus fumigatus* and *Rhizopus microsporus* in a severe acute respiratory syndrome Coronavirus 2 (SARS-CoV-2) patient. *Infect. Dis. Now* **2021**, S2666–9919(21)00030-0; DOI: 10.1016/j.idnow.2021.01.010.
37. Sungurtekin, H.; Sargin, F.; Akbulut, M.; Karaduman, S. Severe Rhinocerebral Mucormycosis Case Developed after COVID-19. *J. Bacteriol. Parasitol* **2021**, 12, 386; Available from: <https://www.longdom.org/open-access/severe-rhinocerebral-mucormycosis-case-developed-after-covid19-61170.html>
38. Pakdel, F.; Ahmadikia, K.; Salehi, M.; Tabari, A.; Jafari, R.; Mehrparvar, G.; et al. Mucormycosis in patients with COVID-19: A cross-sectional descriptive multicenter study from Iran. *Mycoses* **2021**, 10.1111/myc.13334; DOI: 10.1111/myc.13334.
39. Buil, J.B.; van Zanten, A.R.H.; Bentvelsen, R.G.; Rijpstra, T.A.; Goorhuis, B.; van der Voort, S.; et al. Case series of four secondary mucormycosis infections in COVID-19 patients, the Netherlands, December 2020 to May 2021. *Euro. Surveill* **2021**, 26, 2100510; DOI: 10.2807/1560-7917.ES.2021.26.23.2100510.
40. Bayram, N.; Ozsaygılı, C.; Sav, H.; Tekin, Y.; Gundogan, M.; Pangal, E.; et al. Susceptibility of severe COVID-19 patients to rhino-orbital mucormycosis fungal infection in different clinical manifestations. *Jpn. J. Ophthalmol* **2021**, 65, 515–525; doi: 10.1007/s10384-021-00845-5.
41. Rabagliati, R.; Rodríguez, N.; Núñez, C.; Huete, A.; Bravo, S.; Garcia, P. COVID-19–Associated Mold Infection in Critically Ill Patients, Chile. *Emerg. Infect. Dis* **2021**, 27, 1454; DOI: 10.3201/EID2705.204412.
42. Bhavani, P.N.; Patil, V.; Patil, S.D. Imaging findings of Rhino-Orbito-Cerebral Mucormycosis in a COVID-19 patient. *Eurorad*, **2021**, 17205; Accessed on 24 August 2021 [Online]. Available from: <https://www.eurorad.org/case/17205>.
43. Khan, N.; Gutierrez, C.G.; Martinez, D.V.; Proud, K.C. A case report of COVID-19 associated pulmonary mucormycosis. *Arch. Clin. Cases* **2020**, 7, :46–51; doi: 10.22551/2020.28.0703.10172.
